# Supplementary material
Source: PubMed Central journal article supplement (PMC2629336)
Supplement: 0809423105_Appendix_PDF.pdf [file 0809423105_Appendix_PDF.pdf]

**Table S1.** Mixed-model ANOVA and Tukey’s HSD results for the diversity of co-occurring ant species in plots. Sites were locations within 5 different forest stands within the Apalachicola National Forest where we placed one replicate set of all of the (9) possible treatment plots (Table 1). “Ground” and “ant” are the different treatments we assigned for disturbance and ant additions.

| Source          | DF  | Sum of Squares | Mean Square | F Value | Pr > F |
|-----------------|-----|----------------|-------------|---------|--------|
| Model           | 35  | 14.08487450    | 0.40242499  | 3.67    | <.0001 |
| Error           | 99  | 10.84196463    | 0.10951479  |         |        |
| Corrected Total | 134 | 24.92683913    |             |         |        |

  

| Source               | DF | Type III SS | Mean Square | F Value | Pr > F |
|----------------------|----|-------------|-------------|---------|--------|
| year                 | 1  | 4.84407768  | 4.84407768  | 44.23   | <.0001 |
| site                 | 1  | 0.00940012  | 0.00940012  | 0.09    | 0.7702 |
| year*site            | 1  | 0.57967420  | 0.57967420  | 5.29    | 0.0235 |
| ground               | 2  | 3.29115236  | 1.64557618  | 15.03   | <.0001 |
| year*ground          | 2  | 0.03239988  | 0.01619994  | 0.15    | 0.8627 |
| site*ground          | 2  | 0.59478961  | 0.29739480  | 2.72    | 0.0711 |
| year*site*ground     | 2  | 0.24448127  | 0.12224063  | 1.12    | 0.3316 |
| ant                  | 2  | 1.73367532  | 0.86683766  | 7.92    | 0.0006 |
| year*ant             | 2  | 0.40854646  | 0.20427323  | 1.87    | 0.1603 |
| site*ant             | 2  | 0.14824799  | 0.07412400  | 0.68    | 0.5106 |
| year*site*ant        | 2  | 0.10795925  | 0.05397962  | 0.49    | 0.6123 |
| ground*ant           | 4  | 0.56450669  | 0.14112667  | 1.29    | 0.2797 |
| year*ground*ant      | 4  | 0.28563268  | 0.07140817  | 0.65    | 0.6268 |
| site*ground*ant      | 4  | 1.15451371  | 0.28862843  | 2.64    | 0.0385 |
| year*site*ground*ant | 4  | 0.08581728  | 0.02145432  | 0.20    | 0.9400 |

Tukey's Studentized Range (HSD) Tests for Number of species. Means with the same letter are not significantly different.

| Tukey Grouping | Mean    | N  | ground      |
|----------------|---------|----|-------------|
| A              | 5.26144 | 45 | 2 (mow)     |
| A              | 5.11912 | 45 | 1 (control) |
| B              | 4.88285 | 45 | 3 (plow)    |

| Tukey Grouping | Mean    | N  | ant           |
|----------------|---------|----|---------------|
| A              | 5.18198 | 45 | 2 (soil)      |
| A              | 5.15301 | 45 | 1 (nothing)   |
| B              | 4.92841 | 45 | 3 (fire ants) |

| Tukey Grouping | Mean    | N  | year |
|----------------|---------|----|------|
| A              | 5.39416 | 45 | 2004 |
| B              | 4.93909 | 45 | 2005 |
| B              | 4.93016 | 45 | 2006 |

**Table S2.** Mixed-model ANOVA and Tukey’s HSD results for the abundance of co-occurring ant species in plots. Sites were locations within 5 different forest stands within the Apalachicola National Forest where we placed one replicate set of all of the (9) possible treatment plots (Table 1). “Ground” and “ant” are the different treatments we assigned for disturbance and ant additions.

| Source          | DF  | Sum of Squares | Mean Square | F Value | Pr > F |
|-----------------|-----|----------------|-------------|---------|--------|
| Model           | 35  | 9258.70908     | 264.53455   | 6.87    | <.0001 |
| Error           | 99  | 3810.69127     | 38.49183    |         |        |
| Corrected Total | 134 | 13069.40035    |             |         |        |

| Source               | DF | Type III SS | Mean Square | F Value | Pr > F |
|----------------------|----|-------------|-------------|---------|--------|
| year                 | 1  | 2673.685887 | 2673.685887 | 69.46   | <.0001 |
| site                 | 1  | 70.690334   | 70.690334   | 1.84    | 0.1784 |
| year*site            | 1  | 4.672683    | 4.672683    | 0.12    | 0.7283 |
| ground               | 2  | 1955.671821 | 977.835911  | 25.40   | <.0001 |
| year*ground          | 2  | 361.116111  | 180.558055  | 4.69    | 0.0113 |
| site*ground          | 2  | 126.519530  | 63.259765   | 1.64    | 0.1985 |
| year*site*ground     | 2  | 91.802973   | 45.901487   | 1.19    | 0.3078 |
| ant                  | 2  | 2731.377983 | 1365.688991 | 35.48   | <.0001 |
| year*ant             | 2  | 81.899721   | 40.949860   | 1.06    | 0.3490 |
| site*ant             | 2  | 165.493623  | 82.746812   | 2.15    | 0.1219 |
| year*site*ant        | 2  | 8.999121    | 4.499561    | 0.12    | 0.8898 |
| ground*ant           | 4  | 200.907364  | 50.226841   | 1.30    | 0.2735 |
| year*ground*ant      | 4  | 239.046526  | 59.761631   | 1.55    | 0.1930 |
| site*ground*ant      | 4  | 220.167483  | 55.041871   | 1.43    | 0.2297 |
| year*site*ground*ant | 4  | 326.657920  | 81.664480   | 2.12    | 0.0837 |

Tukey's Studentized Range (HSD) Test for Abundance of non-fire ant species. Means with the same letter are not significantly different.

| Tukey Grouping | Mean   | N  | ground        |
|----------------|--------|----|---------------|
| A              | 36.328 | 45 | 2 (mow)       |
| A              | 35.070 | 45 | 1 (control)   |
| B              | 27.699 | 45 | 3 (plow)      |
| Tukey Grouping | Mean   | N  | ant           |
| A              | 37.914 | 45 | 2 (soil)      |
| B              | 34.123 | 45 | 1 (nothing)   |
| C              | 27.059 | 45 | 3 (fire ants) |
| Tukey Grouping | Mean   | N  | year          |
| A              | 39.509 | 45 | 2004          |
| B              | 30.981 | 45 | 2005          |
| B              | 28.608 | 45 | 2006          |

**Table S3.** Ant species listed alphabetically by subfamily and their total abundance in pitfall traps over 3 years. These data were generated from annual summer pitfall trapping of 36 pitfall traps in 45 40 × 40 m plots. The 4,860 samples contained 187,179 ants of 71 species. Exotic species are in boldface.

| <u>Dolichoderinae</u>                           | <u>Abundance</u> |
|-------------------------------------------------|------------------|
| <i>Dolichoderus mariae</i> Forel                | 8,335            |
| <i>Dolichoderus pustulatus</i> Mayr             | 1                |
| <i>Dorymyrmex bossutus</i> (Trager)             | 1,490            |
| <i>Dorymyrmex bureni</i> (Trager)               | 1,032            |
| <i>Forelius pruinus</i> (Roger)                 | 4,950            |
| <br><u>Ecitoninae</u>                           |                  |
| <i>Neivamyrmex carolinensis</i> (Emery)         | 11               |
| <i>Neivamyrmex opacithorax</i> (Emery)          | 1,001            |
| <i>Neivamyrmex texanus</i> Watkins              | 1,504            |
| <br><u>Formicinae</u>                           |                  |
| <i>Brachymyrmex depilis</i> Emery               | 838              |
| <i>Brachymyrmex obscurior</i> Forel             | 23               |
| <i>Camponotus castaneus</i> (Latreille)         | 312              |
| <i>Camponotus floridanus</i> (Buckley)          | 4,964            |
| <i>Camponotus socius</i> Roger                  | 1,381            |
| <i>Formica archboldi</i> M.R. Smith             | 730              |
| <i>Formica dolosa</i> Trager, MacGown & Trager  | 3,145            |
| <i>Formica pallidefulva</i> Latreille           | 2,188            |
| <i>Lasius neoniger</i> Emery                    | 5                |
| <i>Paratrechina arenivaga</i> (Wheeler)         | 3,768            |
| <i>Paratrechina concinna</i> Trager             | 365              |
| <i>Paratrechina faisonensis</i> (Forel)         | 251              |
| <i>Paratrechina parvula</i> (Mayr)              | 10,876           |
| <i>Paratrechina wojciki</i> Trager              | 437              |
| <i>Polyergus lucidus</i> Mayr                   | 193              |
| <br><u>Myrmicinae</u>                           |                  |
| <i>Aphaenogaster ashmeadi</i> (Emery)           | 20               |
| <i>Aphaenogaster flemingi</i> M.R. Smith        | 24               |
| <i>Aphaenogaster floridana</i> M.R. Smith       | 360              |
| <i>Aphaenogaster treatae</i> Forel              | 3,687            |
| <i>Aphaenogaster umphreyi</i> Deyrup & Davis    | 1                |
| <b><i>Cardiocondyla nuda</i></b> (Mayr)         | 39               |
| <b><i>Cardiocondyla wroughtonii</i></b> (Forel) | 290              |
| <i>Crematogaster atkinsoni</i> Wheeler          | 91               |
| <i>Crematogaster cerasi</i> (Fitch)             | 3,668            |
| <i>Crematogaster minutissima</i> Mayr           | 1,045            |
| <i>Crematogaster missuriensis</i> Emery         | 41               |
| <i>Crematogaster pilosa</i> Emery               | 52               |

|                                                      |        |
|------------------------------------------------------|--------|
| <b>Cyphomyrmex rimosus</b> (Spinola)                 | 2,952  |
| <i>Monomorium viride</i> Brown                       | 486    |
| <i>Pheidole adrianoi</i> Naves                       | 1,233  |
| <i>Pheidole dentata</i> Mayr                         | 10,965 |
| <i>Pheidole dentigula</i> M.R. Smith                 | 264    |
| <i>Pheidole diversipilosa</i> Wheeler                | 78     |
| <i>Pheidole floridana</i> Emery                      | 14     |
| <i>Pheidole metallescens</i> Emery                   | 37     |
| <b>Pheidole moerens</b> Wheeler                      | 40     |
| <i>Pheidole morrissi</i> Forel                       | 40,535 |
| <b>Pheidole obscurithorax</b> Naves                  | 59     |
| <i>Pogonomyrmex badius</i> (Latrielle)               | 450    |
| <i>Pyramica apalachicolensis</i> Deyrup & Lubertazzi | 7      |
| <i>Pyramica creightoni</i> (M.R. Smith)              | 39     |
| <i>Pyramica deyrupei</i> Bolton                      | 8      |
| <i>Pyramica dietrichi</i> (M.R. Smith)               | 7      |
| <b>Pyramica margaritae</b> (Forel)                   | 82     |
| <b>Pyramica membranifera</b> (Emery)                 | 8      |
| <i>Pyramica ornata</i> (May)                         | 1      |
| <i>Pyramica talpa</i> (Weber)                        | 5      |
| <i>Solenopsis abdita</i> Thompson                    | 22     |
| <i>Solenopsis carolinensis</i> Forel                 | 30,574 |
| <b>Solenopsis invicta</b> Buren                      | 28,166 |
| <i>Solenopsis nickersoni</i> Thompson                | 7,132  |
| <i>Solenopsis pergandei</i> Forel                    | 1,003  |
| <i>Solenopsis tennesseensis</i> M.R. Smith           | 32     |
| <i>Solenopsis tonsa</i> Thompson                     | 2      |
| <i>Strumigenys louisianae</i> Roger                  | 28     |
| <i>Temnothorax palustris</i> (Deyrup & Cover)        | 445    |
| <i>Temnothorax pergandei</i> (Emery)                 | 3,263  |
| <i>Temnothorax texanus</i> (Wheeler)                 | 259    |
| <i>Trachymyrmex septentrionalis</i> (McCook)         | 733    |
| <br><u>Ponerinae</u>                                 |        |
| <i>Hypoponera opaciceps</i> (May)                    | 169    |
| <i>Hypoponera inexorata</i> (Forel)                  | 3      |
| <i>Hypoponera opacior</i> (Forel)                    | 3      |
| <i>Odontomachus brunneus</i> (Patton)                | 957    |
